# Supplementary material for: Molecular basis for the inhibition of β-hydroxyacyl-ACP dehydratase HadAB complex from Mycobacterium tuberculosis by flavonoid inhibitors
Source: PubMed Central journal article supplement (PMC4491049; doi:10.1007/s13238-015-0181-1), 2015-06-17
Supplement: 13238_2015_181_MOESM1_ESM.pdf [file 13238_2015_181_MOESM1_ESM.pdf]

---

## Supplementary Information

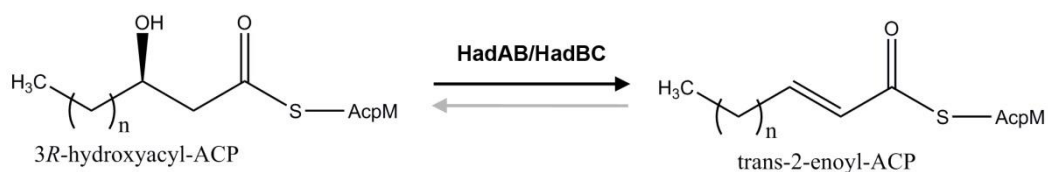

**Supplementary Figure S1** The scheme of *Mtb*HadAB/*Mtb*HadBC dehydration reaction. The reaction is reversible. However, in the context of FAS-II elongation cycle, this reaction tends to the dehydration direction.

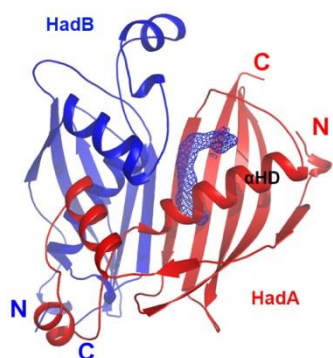

**Supplementary Figure S2** Clear difference electron density ( $2Fo-Fc$  map for the native *Mtb*HadAB; blue colored mesh) was observed for an aliphatic ligand bound in the cavity. The ligand was bound to *Mtb*HadAB during its expression in *E. coli*.

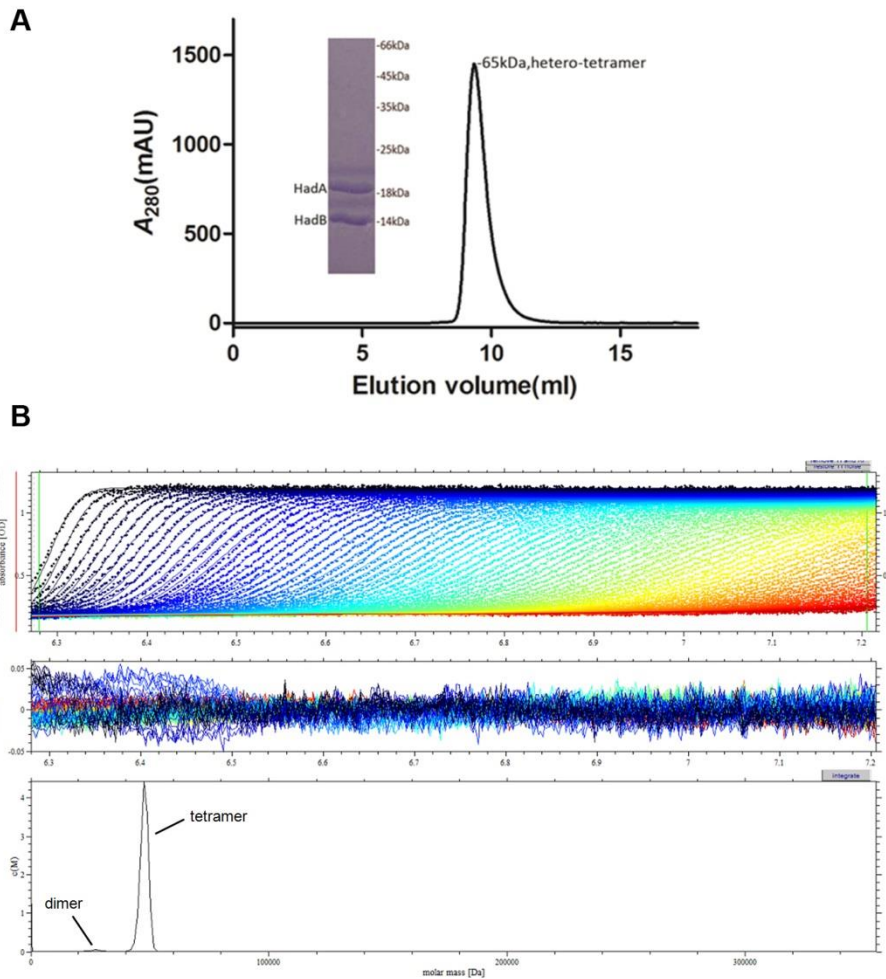

**Supplementary Figure S3** Experimental analysis suggested *Mtb*HadAB complex formed a hetero-tetramer in solution at 16 °C.

(A) Gel filtration chromatography using a Superdex 75 column and SDS-PAGE analysis (inset) of *Mtb*HadAB complex. An elution peak volume of 9.3 mL corresponded to an approximate molecular mass of 65 kDa based on calibration of the column using standard molecular weight markers.

(B) Analytical ultracentrifugation analysis of *Mtb*HadAB complex. The upper panel shows the raw data from the time-course measurement of absorbance of the sample at 280 nm along the sample cell length. The middle panel shows residuals after fitting the data to the continuous size-distribution model. The lower panel shows the continuous mass distribution for the calculated solution. *Mtb*HadAB predominantly exists as a tetramer in solution.

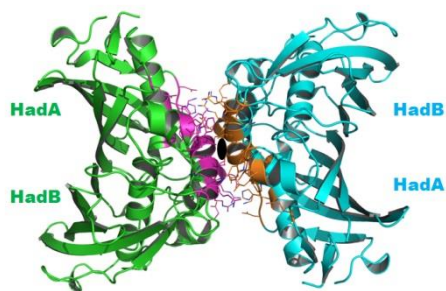

**Supplementary Figure S4** Overall structure of a tetramer of *MtbHadAB* complex and interactions between two dimers in *MtbHadAB* tetramer. Two dimers of *MtbHadAB* (green and cyan) are symmetric related by a two-fold axis (dark ellipse) along inside the interface between each other. Interacting residues from the two dimers are colored in magenta and orange. Side chains of these residues are shown as sticks.

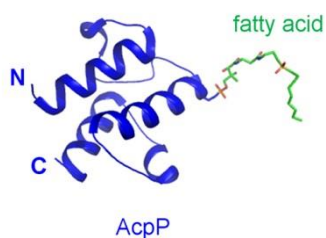

**Supplementary Figure S5** Cartoon representation of AcpP bound with fatty acid. The cartoon model is shown as an example similar to substrate of *MtbHadAB*, and it was drawn using the structure of FabA from *E. coli* in complex with acyl-carrier protein bound with fatty acid (PDB code 4KEH). FabA protein is not shown. *MtbAcpM* delivers very long chain fatty acids to *MtbHadAB* for catalysis.

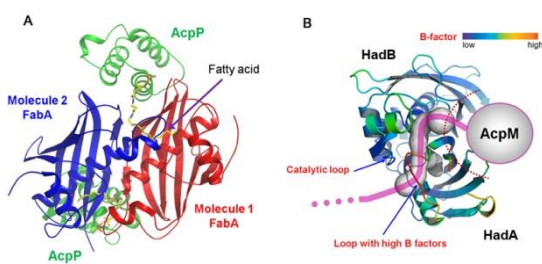

**Supplementary Figure S6** Mode of binding of substrate to FAS-II dehydratases  
An acyl carrier protein delivers fatty acid to dehydratases of FAS-II system. Panel (A) depicts a dimer of FabA from *E. coli* (PDB code 4KEH) in complex with two molecules of AcpP bound with fatty acid. A homodimer of FabA has two active sites. Panel (B) shows a model for binding of AcpM to the *MtbHadAB* heterodimer. Fatty acid is depicted as a magenta ribbon, while AcpM is shown as a grey sphere binding to the bow shaped pocket (dashed red curve) at the back of *MtbHadAB*. Substrate binding channel is shown in gray surface representation. The rainbow color depicts the level of residue temperature factor. The higher the temperature factor, the redder the color. *MtbHadAB* has only one fatty acid binding channel.

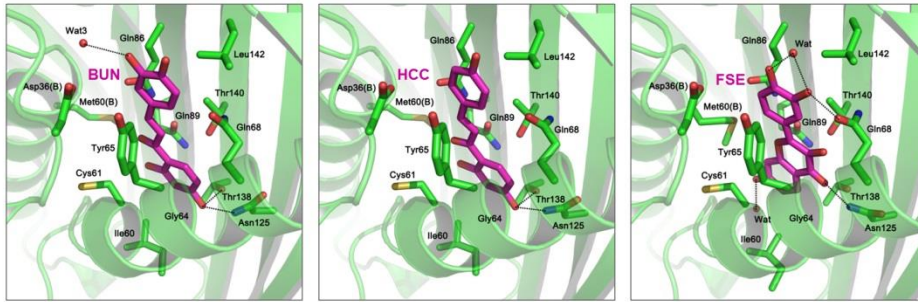

**Supplementary Figure S7** Three flavonoid inhibitors bind in the pocket. Butein (BUN), 2',4,4'-trihydroxychalcone (HCC) and Fisetin (FSE) are shown as sticks and colored in magenta. Side chains of surrounded residues are also shown as sticks. Interacting water molecules are shown as spheres. Hydrogen bond interactions are marked with dashed lines.

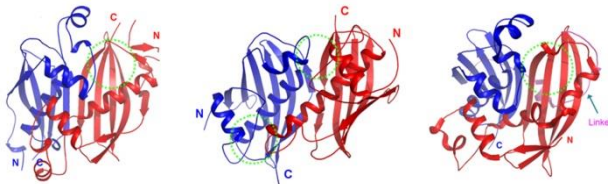

**Supplementary Figure S8** Structures of homologues of *MtbHadAB*. Although the dehydratase *MtbHadAB* does not share any sequence identity with other dehydratases beyond *Corynebacterineae*, the overall fold adopted by the protein is similar to other dehydratases like FabA from *E. coli* (PDB code 4KEH) and MFE-2 from *Candida tropicalis* (PDB code 1PN4). While *MtbHadAB* forms a hetero-dimer with a single active site, FabA forms a homo-dimer with two active sites. MFE-2 hydratase domain forms a pseudo-dimer; a linker connects two hotdog subunits, with a single active site for catalysis.

## Supplementary Tables 1-3

### Supplementary Table 1 Data collection and crystallographic statistics.

| Data set                              | Se-Met-HadAB<br>(peak)                 | HadAB (native)              | HadAB-BUN                   | HadAB-HCC                   | HadAB-FSE                   |
|---------------------------------------|----------------------------------------|-----------------------------|-----------------------------|-----------------------------|-----------------------------|
| <b>Data collection</b>                |                                        |                             |                             |                             |                             |
| Space group                           | <i>P</i> 4 <sub>1</sub> 212            | <i>P</i> 4 <sub>1</sub> 212 | <i>P</i> 4 <sub>1</sub> 212 | <i>P</i> 4 <sub>1</sub> 212 | <i>P</i> 4 <sub>1</sub> 212 |
| Unit-cell parameters                  |                                        |                             |                             |                             |                             |
| a, b, c (Å)                           | a=b=82.2, c=142.3                      | a=b=82.0, c=139.8           | a=b=82.4, c=140.8           | a=b=82.4, c=141.5           | a=b=82.3, c=140.2           |
| $\alpha, \beta, \gamma$ (°)           | $\alpha=\beta=\gamma=90.0$             | $\alpha=\beta=\gamma=90.0$  | $\alpha=\beta=\gamma=90.0$  | $\alpha=\beta=\gamma=90.0$  | $\alpha=\beta=\gamma=90.0$  |
| Wavelength (Å)                        | 0.97905                                | 1.00000                     | 0.98000                     | 1.00000                     | 0.98000                     |
| Resolution (Å)                        | 50.00-2.20<br>(2.28-2.20) <sup>a</sup> | 50.00-1.75<br>(1.81-1.75)   | 50.00-2.20<br>(2.28-2.20)   | 50.00-2.20<br>(2.28-2.20)   | 50.00-2.05<br>(2.12-2.05)   |
| Total observation                     | 442,538                                | 462,997                     | 236,291                     | 237,827                     | 294,370                     |
| Unique reflections                    | 25,553                                 | 48,837                      | 25,519                      | 25,514                      | 31,026                      |
| Data completeness (%)                 | 100.0 (100.0)                          | 99.9 (100.0)                | 99.9 (100.0)                | 99.7 (100.0)                | 99.8 (99.9)                 |
| $R_{\text{merge}}^b$                  | 0.100 (0.413)                          | 0.058 (0.424)               | 0.084 (0.415)               | 0.060 (0.419)               | 0.084 (0.440)               |
| $I/\sigma(I)$                         | 31.2 (8.9)                             | 35.8 (5.8)                  | 26.8 (5.9)                  | 35.0 (5.5)                  | 28.1 (5.7)                  |
| Redundancy                            | 17.3 (18.3)                            | 9.5 (9.6)                   | 9.3 (9.4)                   | 9.3 (9.6)                   | 9.5 (9.6)                   |
| <b>Refinement</b>                     |                                        |                             |                             |                             |                             |
| Resolution (Å)                        |                                        | 36.68-1.75                  | 40.78-2.20                  | 36.66-2.20                  | 40.62-2.05                  |
| Reflections used                      |                                        | 48,754                      | 25,440                      | 25,449                      | 30,966                      |
| $R_{\text{work}} / R_{\text{free}}^c$ |                                        | 0.157 / 0.185               | 0.164 / 0.195               | 0.186 / 0.213               | 0.158 / 0.190               |
| No. of non-H atoms                    |                                        |                             |                             |                             |                             |
| HadA / HadB                           |                                        | 1,170 / 1,085               | 1,226 / 1,080               | 1,214 / 1,080               | 1,219 / 1,080               |
| Ligands                               |                                        | 78                          | 32                          | 45                          | 33                          |
| Water                                 |                                        | 199                         | 173                         | 145                         | 245                         |
| Average B factor (Å <sup>2</sup> )    |                                        |                             |                             |                             |                             |
| HadA / HadB                           |                                        | 31.2 / 28.6                 | 43.0 / 40.3                 | 53.3 / 50.3                 | 36.6 / 34.4                 |
| Ligands                               |                                        | 52.4                        | 55.3                        | 67.2                        | 34.5                        |
| Water                                 |                                        | 40.9                        | 46.2                        | 52.0                        | 43.2                        |
| R.m.s. deviation                      |                                        |                             |                             |                             |                             |
| Bond lengths (Å)                      |                                        | 0.019                       | 0.011                       | 0.003                       | 0.012                       |

|                       |       |       |       |       |
|-----------------------|-------|-------|-------|-------|
| Bond angles (°)       | 1.682 | 1.328 | 0.711 | 1.234 |
| Ramachandran plot (%) |       |       |       |       |
| Favored               | 98.3  | 98.0  | 97.3  | 97.0  |
| Allowed               | 1.7   | 2.0   | 2.7   | 3.0   |
| Outliers              | 0.0   | 0.0   | 0.0   | 0.0   |

<sup>a</sup>Values in parentheses are for the highest resolution shell.

<sup>b</sup> $R_{\text{merge}} = \frac{\sum_h \sum_i |I_{ih} - \langle I_h \rangle|}{\sum_h \sum_i \langle I_h \rangle}$ , where  $\langle I_h \rangle$  is the mean intensity of the observations of  $I_{ih}$  of reflection  $h$ .

<sup>c</sup> $R_{\text{work}} = \frac{\sum_h |F_o - F_c|}{\sum_h F_o}$ , where  $F_o$  and  $F_c$  are the observed and calculated structure factor amplitudes of reflection  $h$ .

$R_{\text{free}}$  is mathematically equivalent to  $R_{\text{work}}$ , but was measured over 5% of the data.

## Supplementary Table 2 List of intermolecular interactions ( $\leq 4 \text{ \AA}$ ) between the subunits of *Mtb*HadAB hetero-dimer.

Interactions were calculated by NCONTACT program of CCP4, Hydrogen bonds are highlighted in green, while salt bridges are highlighted in blue.

| No. | Chain A           | Dist. [Å] | Chain B           |
|-----|-------------------|-----------|-------------------|
| 1   | A: GLU 47 [ O ]   | 3.60      | B: GLY -1 [ CA ]  |
| 2   | A: GLU 47 [ O ]   | 3.40      | B: GLY -1 [ C ]   |
| 3   | A: GLY 49 [ N ]   | 3.82      | B: GLY -1 [ O ]   |
| 4   | A: GLU 47 [ O ]   | 3.16      | B: GLY -1 [ O ]   |
| 5   | A: LEU 48 [ CA ]  | 3.30      | B: GLY -1 [ O ]   |
| 6   | A: LEU 48 [ C ]   | 3.18      | B: GLY -1 [ O ]   |
| 7   | A: LEU 48 [ O ]   | 3.23      | B: GLY -1 [ O ]   |
| 8   | A: GLN 33 [ OE1 ] | 3.72      | B: TYR 20 [ CB ]  |
| 9   | A: GLN 33 [ O ]   | 3.87      | B: TYR 20 [ CE2 ] |
| 10  | A: GLN 33 [ OE1 ] | 3.51      | B: TYR 20 [ CD2 ] |
| 11  | A: GLN 33 [ OE1 ] | 3.55      | B: PRO 21 [ CD ]  |
| 12  | A: GLN 33 [ CD ]  | 3.66      | B: PRO 21 [ O ]   |
| 13  | A: GLN 33 [ OE1 ] | 3.54      | B: PRO 21 [ O ]   |
| 14  | A: GLN 33 [ NE2 ] | 2.98      | B: PRO 21 [ O ]   |
| 15  | A: GLN 33 [ NE2 ] | 3.92      | B: LEU 22 [ CD2 ] |
| 16  | A: ALA 31 [ CA ]  | 3.79      | B: ASN 29 [ OD1 ] |
| 17  | A: ALA 31 [ CB ]  | 3.49      | B: ASN 29 [ OD1 ] |
| 18  | A: VAL 32 [ CG1 ] | 3.65      | B: TYR 30 [ CE1 ] |
| 19  | A: TYR 28 [ CE1 ] | 3.61      | B: TYR 30 [ CE1 ] |
| 20  | A: TYR 28 [ CZ ]  | 3.99      | B: TYR 30 [ CE1 ] |
| 21  | A: TYR 28 [ OH ]  | 3.80      | B: TYR 30 [ CE1 ] |
| 22  | A: TYR 28 [ OH ]  | 3.90      | B: TYR 30 [ CZ ]  |
| 23  | A: CYS 61 [ SG ]  | 3.44      | B: TYR 30 [ OH ]  |

---

|    |    |     |    |   |     |   |      |    |     |    |   |     |   |
|----|----|-----|----|---|-----|---|------|----|-----|----|---|-----|---|
| 24 | A: | TYR | 28 | [ | CE1 | ] | 3.72 | B: | TYR | 30 | [ | OH  | ] |
| 25 | A: | TYR | 28 | [ | CZ  | ] | 3.84 | B: | TYR | 30 | [ | OH  | ] |
| 26 | A: | TYR | 28 | [ | OH  | ] | 3.02 | B: | TYR | 30 | [ | OH  | ] |
| 27 | A: | GLU | 27 | [ | OE2 | ] | 3.87 | B: | VAL | 33 | [ | CA  | ] |
| 28 | A: | LYS | 24 | [ | NZ  | ] | 3.90 | B: | VAL | 33 | [ | CA  | ] |
| 29 | A: | GLU | 27 | [ | OE2 | ] | 3.84 | B: | VAL | 33 | [ | CB  | ] |
| 30 | A: | GLU | 27 | [ | OE2 | ] | 3.64 | B: | VAL | 33 | [ | CG1 | ] |
| 31 | A: | GLU | 27 | [ | CG  | ] | 3.81 | B: | VAL | 33 | [ | CG2 | ] |
| 32 | A: | GLU | 27 | [ | OE2 | ] | 3.48 | B: | VAL | 33 | [ | CG2 | ] |
| 33 | A: | LYS | 24 | [ | NZ  | ] | 3.70 | B: | VAL | 33 | [ | C   | ] |
| 34 | A: | LYS | 24 | [ | NZ  | ] | 2.77 | B: | VAL | 33 | [ | O   | ] |
| 35 | A: | LYS | 24 | [ | CE  | ] | 3.51 | B: | VAL | 33 | [ | O   | ] |
| 36 | A: | TYR | 65 | [ | CE1 | ] | 3.52 | B: | GLY | 35 | [ | O   | ] |
| 37 | A: | TYR | 65 | [ | CZ  | ] | 3.92 | B: | ASP | 36 | [ | CA  | ] |
| 38 | A: | TYR | 65 | [ | OH  | ] | 3.98 | B: | ASP | 36 | [ | CA  | ] |
| 39 | A: | TYR | 65 | [ | OH  | ] | 3.76 | B: | ASP | 36 | [ | OD1 | ] |
| 40 | A: | GLU | 81 | [ | OE2 | ] | 3.84 | B: | ASN | 38 | [ | N   | ] |
| 41 | A: | GLU | 81 | [ | CD  | ] | 3.56 | B: | ASN | 38 | [ | CA  | ] |
| 42 | A: | GLU | 81 | [ | OE1 | ] | 3.50 | B: | ASN | 38 | [ | CA  | ] |
| 43 | A: | GLU | 81 | [ | OE2 | ] | 3.71 | B: | ASN | 38 | [ | CA  | ] |
| 44 | A: | GLU | 81 | [ | CG  | ] | 3.97 | B: | ASN | 38 | [ | CB  | ] |
| 45 | A: | GLU | 81 | [ | CD  | ] | 3.76 | B: | ASN | 38 | [ | CB  | ] |
| 46 | A: | GLU | 81 | [ | OE2 | ] | 3.84 | B: | ASN | 38 | [ | CB  | ] |
| 47 | A: | GLU | 81 | [ | CG  | ] | 3.53 | B: | ASN | 38 | [ | CG  | ] |
| 48 | A: | GLU | 81 | [ | CD  | ] | 3.86 | B: | ASN | 38 | [ | CG  | ] |
| 49 | A: | GLU | 81 | [ | CG  | ] | 3.83 | B: | ASN | 38 | [ | OD1 | ] |
| 50 | A: | GLU | 81 | [ | CG  | ] | 3.56 | B: | ASN | 38 | [ | ND2 | ] |
| 51 | A: | GLU | 81 | [ | O   | ] | 3.30 | B: | ASN | 38 | [ | ND2 | ] |
| 52 | A: | GLU | 81 | [ | OE1 | ] | 3.25 | B: | PRO | 39 | [ | CD  | ] |
| 53 | A: | GLN | 86 | [ | OE1 | ] | 3.30 | B: | MET | 60 | [ | CG  | ] |
| 54 | A: | GLN | 86 | [ | OE1 | ] | 3.70 | B: | MET | 60 | [ | SD  | ] |
| 55 | A: | GLN | 86 | [ | NE2 | ] | 3.53 | B: | MET | 60 | [ | SD  | ] |
| 56 | A: | GLN | 86 | [ | CD  | ] | 4.00 | B: | MET | 60 | [ | SD  | ] |
| 57 | A: | THR | 58 | [ | CB  | ] | 3.76 | B: | MET | 60 | [ | CE  | ] |
| 58 | A: | THR | 58 | [ | CG2 | ] | 3.82 | B: | MET | 60 | [ | CE  | ] |
| 59 | A: | ALA | 31 | [ | O   | ] | 3.36 | B: | LEU | 61 | [ | CD1 | ] |
| 60 | A: | VAL | 32 | [ | CG1 | ] | 3.87 | B: | LEU | 61 | [ | CD1 | ] |
| 61 | A: | THR | 58 | [ | CG2 | ] | 3.75 | B: | MET | 63 | [ | CG  | ] |
| 62 | A: | GLN | 89 | [ | CB  | ] | 3.68 | B: | MET | 63 | [ | SD  | ] |
| 63 | A: | GLN | 89 | [ | CG  | ] | 3.90 | B: | MET | 63 | [ | SD  | ] |
| 64 | A: | LEU | 91 | [ | CD1 | ] | 3.77 | B: | MET | 63 | [ | CE  | ] |
| 65 | A: | GLN | 89 | [ | O   | ] | 3.62 | B: | MET | 63 | [ | CE  | ] |
| 66 | A: | THR | 58 | [ | CG2 | ] | 3.99 | B: | MET | 63 | [ | C   | ] |
| 67 | A: | THR | 58 | [ | OG1 | ] | 3.99 | B: | GLY | 64 | [ | N   | ] |

---

|     |    |     |    |   |     |   |      |    |     |    |   |     |   |
|-----|----|-----|----|---|-----|---|------|----|-----|----|---|-----|---|
| 68  | A: | THR | 58 | [ | CG2 | ] | 3.84 | B: | GLY | 64 | [ | N   | ] |
| 69  | A: | THR | 58 | [ | OG1 | ] | 3.26 | B: | GLY | 64 | [ | CA  | ] |
| 70  | A: | THR | 58 | [ | CG2 | ] | 3.74 | B: | GLY | 64 | [ | CA  | ] |
| 71  | A: | ASN | 34 | [ | ND2 | ] | 3.92 | B: | GLY | 64 | [ | C   | ] |
| 72  | A: | VAL | 32 | [ | CB  | ] | 3.90 | B: | GLY | 64 | [ | C   | ] |
| 73  | A: | ASN | 34 | [ | ND2 | ] | 2.99 | B: | GLY | 64 | [ | O   | ] |
| 74  | A: | ASN | 34 | [ | CG  | ] | 3.75 | B: | GLY | 64 | [ | O   | ] |
| 75  | A: | ASN | 34 | [ | OD1 | ] | 3.67 | B: | GLY | 64 | [ | O   | ] |
| 76  | A: | VAL | 32 | [ | O   | ] | 3.88 | B: | ILE | 65 | [ | N   | ] |
| 77  | A: | VAL | 32 | [ | O   | ] | 3.54 | B: | ILE | 65 | [ | CA  | ] |
| 78  | A: | VAL | 32 | [ | O   | ] | 3.46 | B: | ILE | 65 | [ | CG1 | ] |
| 79  | A: | GLN | 33 | [ | NE2 | ] | 3.97 | B: | ILE | 65 | [ | CD1 | ] |
| 80  | A: | LEU | 57 | [ | CD1 | ] | 3.85 | B: | GLY | 67 | [ | CA  | ] |
| 81  | A: | LEU | 57 | [ | CD1 | ] | 3.90 | B: | GLY | 67 | [ | O   | ] |
| 82  | A: | ASN | 34 | [ | ND2 | ] | 3.43 | B: | GLY | 68 | [ | N   | ] |
| 83  | A: | ASN | 34 | [ | CG  | ] | 3.74 | B: | GLY | 68 | [ | N   | ] |
| 84  | A: | ASN | 34 | [ | OD1 | ] | 3.51 | B: | GLY | 68 | [ | N   | ] |
| 85  | A: | ASN | 34 | [ | ND2 | ] | 3.29 | B: | GLY | 68 | [ | CA  | ] |
| 86  | A: | ASN | 34 | [ | CG  | ] | 3.45 | B: | GLY | 68 | [ | CA  | ] |
| 87  | A: | ASN | 34 | [ | OD1 | ] | 3.48 | B: | GLY | 68 | [ | CA  | ] |
| 88  | A: | TYR | 39 | [ | OH  | ] | 3.69 | B: | THR | 71 | [ | CB  | ] |
| 89  | A: | LEU | 57 | [ | CD2 | ] | 3.78 | B: | THR | 71 | [ | OG1 | ] |
| 90  | A: | LEU | 57 | [ | CG  | ] | 3.37 | B: | THR | 71 | [ | OG1 | ] |
| 91  | A: | LEU | 57 | [ | CD1 | ] | 3.27 | B: | THR | 71 | [ | OG1 | ] |
| 92  | A: | TYR | 39 | [ | OH  | ] | 3.40 | B: | THR | 71 | [ | CG2 | ] |
| 93  | A: | TRP | 38 | [ | CZ2 | ] | 3.97 | B: | THR | 71 | [ | O   | ] |
| 94  | A: | ASP | 36 | [ | OD2 | ] | 3.85 | B: | SER | 72 | [ | CA  | ] |
| 95  | A: | ASP | 36 | [ | OD2 | ] | 3.41 | B: | SER | 72 | [ | CB  | ] |
| 96  | A: | ASP | 36 | [ | OD1 | ] | 3.90 | B: | SER | 72 | [ | CB  | ] |
| 97  | A: | ASP | 36 | [ | CG  | ] | 3.66 | B: | SER | 72 | [ | OG  | ] |
| 98  | A: | ASP | 36 | [ | OD2 | ] | 2.68 | B: | SER | 72 | [ | OG  | ] |
| 99  | A: | ASP | 36 | [ | OD1 | ] | 3.89 | B: | SER | 72 | [ | OG  | ] |
| 100 | A: | TRP | 38 | [ | CH2 | ] | 3.84 | B: | GLY | 75 | [ | CA  | ] |
| 101 | A: | TRP | 38 | [ | CH2 | ] | 3.66 | B: | GLY | 75 | [ | C   | ] |
| 102 | A: | TRP | 38 | [ | CZ3 | ] | 3.64 | B: | GLY | 75 | [ | O   | ] |
| 103 | A: | TRP | 38 | [ | CH2 | ] | 3.68 | B: | GLY | 75 | [ | O   | ] |
| 104 | A: | LEU | 48 | [ | CD2 | ] | 3.83 | B: | GLY | 75 | [ | O   | ] |
| 105 | A: | TYR | 50 | [ | OH  | ] | 3.96 | B: | ASP | 76 | [ | CG  | ] |
| 106 | A: | LEU | 48 | [ | CD1 | ] | 3.96 | B: | ASP | 76 | [ | OD1 | ] |
| 107 | A: | TYR | 50 | [ | OH  | ] | 3.48 | B: | ASP | 76 | [ | OD1 | ] |
| 108 | A: | TYR | 50 | [ | CE2 | ] | 3.82 | B: | ASP | 76 | [ | OD1 | ] |
| 109 | A: | TYR | 50 | [ | OH  | ] | 3.55 | B: | ASP | 76 | [ | OD2 | ] |
| 110 | A: | TRP | 38 | [ | CD1 | ] | 3.54 | B: | PRO | 77 | [ | CG  | ] |
| 111 | A: | TRP | 38 | [ | NE1 | ] | 3.38 | B: | PRO | 77 | [ | CG  | ] |



---

|     |    |     |    |   |     |   |      |    |     |    |   |     |   |
|-----|----|-----|----|---|-----|---|------|----|-----|----|---|-----|---|
| 112 | A: | LEU | 54 | [ | CD1 | ] | 3.94 | B: | PRO | 77 | [ | CG  | ] |
| 113 | A: | TYR | 39 | [ | CE1 | ] | 3.86 | B: | PRO | 77 | [ | CG  | ] |
| 114 | A: | TYR | 39 | [ | OH  | ] | 3.69 | B: | PRO | 77 | [ | CG  | ] |
| 115 | A: | TRP | 38 | [ | CD1 | ] | 3.89 | B: | PRO | 77 | [ | CD  | ] |
| 116 | A: | TRP | 38 | [ | NE1 | ] | 3.57 | B: | PRO | 77 | [ | CD  | ] |
| 117 | A: | TRP | 38 | [ | CE2 | ] | 3.66 | B: | PRO | 77 | [ | CD  | ] |
| 118 | A: | LEU | 54 | [ | CD1 | ] | 4.00 | B: | PRO | 77 | [ | CD  | ] |
| 119 | A: | TYR | 50 | [ | OH  | ] | 3.96 | B: | GLY | 78 | [ | N   | ] |
| 120 | A: | TYR | 50 | [ | OH  | ] | 3.31 | B: | GLY | 78 | [ | CA  | ] |
| 121 | A: | PRO | 96 | [ | CB  | ] | 3.92 | B: | GLY | 78 | [ | CA  | ] |
| 122 | A: | TYR | 50 | [ | OH  | ] | 3.92 | B: | GLY | 78 | [ | C   | ] |
| 123 | A: | LEU | 57 | [ | CD1 | ] | 3.90 | B: | VAL | 80 | [ | CG1 | ] |
| 124 | A: | PHE | 93 | [ | CE2 | ] | 3.81 | B: | VAL | 80 | [ | CG1 | ] |
| 125 | A: | PHE | 93 | [ | CD2 | ] | 3.93 | B: | VAL | 80 | [ | CG1 | ] |
| 126 | A: | PHE | 93 | [ | CD2 | ] | 4.00 | B: | VAL | 80 | [ | C   | ] |
| 127 | A: | PHE | 93 | [ | CB  | ] | 3.55 | B: | VAL | 80 | [ | O   | ] |
| 128 | A: | PHE | 93 | [ | CG  | ] | 3.90 | B: | VAL | 80 | [ | O   | ] |
| 129 | A: | PHE | 93 | [ | CD2 | ] | 3.54 | B: | VAL | 80 | [ | O   | ] |
| 130 | A: | PHE | 93 | [ | N   | ] | 3.85 | B: | THR | 81 | [ | C   | ] |
| 131 | A: | PHE | 93 | [ | CD2 | ] | 3.65 | B: | THR | 81 | [ | C   | ] |
| 132 | A: | LYS | 92 | [ | CA  | ] | 3.73 | B: | THR | 81 | [ | O   | ] |
| 133 | A: | LYS | 92 | [ | C   | ] | 3.79 | B: | THR | 81 | [ | O   | ] |
| 134 | A: | PHE | 93 | [ | N   | ] | 2.94 | B: | THR | 81 | [ | O   | ] |
| 135 | A: | PHE | 93 | [ | CA  | ] | 3.85 | B: | THR | 81 | [ | O   | ] |
| 136 | A: | PHE | 93 | [ | CB  | ] | 3.97 | B: | THR | 81 | [ | O   | ] |
| 137 | A: | PHE | 93 | [ | CD2 | ] | 3.83 | B: | THR | 81 | [ | O   | ] |
| 138 | A: | PHE | 93 | [ | O   | ] | 3.61 | B: | THR | 81 | [ | O   | ] |
| 139 | A: | PHE | 93 | [ | CD2 | ] | 3.67 | B: | GLU | 82 | [ | N   | ] |
| 140 | A: | PHE | 93 | [ | CE2 | ] | 3.93 | B: | GLU | 82 | [ | CA  | ] |
| 141 | A: | PHE | 93 | [ | CD2 | ] | 3.76 | B: | GLU | 82 | [ | CA  | ] |
| 142 | A: | LEU | 91 | [ | O   | ] | 3.17 | B: | GLU | 82 | [ | CA  | ] |
| 143 | A: | LEU | 91 | [ | O   | ] | 3.37 | B: | GLU | 82 | [ | CB  | ] |
| 144 | A: | PHE | 93 | [ | CE2 | ] | 3.80 | B: | GLU | 82 | [ | C   | ] |
| 145 | A: | LEU | 91 | [ | O   | ] | 3.56 | B: | GLU | 82 | [ | C   | ] |
| 146 | A: | PHE | 93 | [ | CE2 | ] | 3.86 | B: | TYR | 83 | [ | N   | ] |
| 147 | A: | LEU | 91 | [ | O   | ] | 2.96 | B: | TYR | 83 | [ | N   | ] |
| 148 | A: | PHE | 93 | [ | CE2 | ] | 3.82 | B: | TYR | 83 | [ | CB  | ] |
| 149 | A: | LEU | 57 | [ | CD1 | ] | 3.74 | B: | TYR | 83 | [ | CD2 | ] |
| 150 | A: | LEU | 91 | [ | CB  | ] | 3.34 | B: | TYR | 83 | [ | O   | ] |
| 151 | A: | LEU | 91 | [ | CD1 | ] | 3.96 | B: | TYR | 83 | [ | O   | ] |
| 152 | A: | LEU | 91 | [ | CG  | ] | 3.61 | B: | TYR | 83 | [ | O   | ] |
| 153 | A: | VAL | 90 | [ | C   | ] | 4.00 | B: | TYR | 83 | [ | O   | ] |
| 154 | A: | LEU | 91 | [ | CA  | ] | 3.64 | B: | TYR | 83 | [ | O   | ] |
| 155 | A: | LEU | 91 | [ | N   | ] | 3.06 | B: | TYR | 83 | [ | O   | ] |

---

|     |    |     |    |         |      |    |     |     |         |
|-----|----|-----|----|---------|------|----|-----|-----|---------|
| 156 | A: | LEU | 91 | [ O ]   | 3.69 | B: | TYR | 83  | [ O ]   |
| 157 | A: | GLN | 89 | [ O ]   | 3.35 | B: | ASN | 84  | [ CA ]  |
| 158 | A: | GLN | 89 | [ O ]   | 3.99 | B: | ASN | 84  | [ CB ]  |
| 159 | A: | VAL | 90 | [ CG1 ] | 3.98 | B: | ASN | 84  | [ CG ]  |
| 160 | A: | VAL | 90 | [ CA ]  | 3.42 | B: | ASN | 84  | [ OD1 ] |
| 161 | A: | VAL | 90 | [ CB ]  | 3.73 | B: | ASN | 84  | [ OD1 ] |
| 162 | A: | VAL | 90 | [ C ]   | 3.70 | B: | ASN | 84  | [ OD1 ] |
| 163 | A: | VAL | 90 | [ CG1 ] | 3.34 | B: | ASN | 84  | [ OD1 ] |
| 164 | A: | LEU | 91 | [ N ]   | 3.07 | B: | ASN | 84  | [ OD1 ] |
| 165 | A: | LEU | 91 | [ O ]   | 3.52 | B: | ASN | 84  | [ OD1 ] |
| 166 | A: | GLN | 89 | [ O ]   | 3.59 | B: | ASN | 84  | [ C ]   |
| 167 | A: | GLN | 89 | [ O ]   | 2.89 | B: | VAL | 85  | [ N ]   |
| 168 | A: | GLN | 89 | [ O ]   | 3.94 | B: | VAL | 85  | [ CA ]  |
| 169 | A: | ASP | 88 | [ OD2 ] | 3.57 | B: | VAL | 85  | [ C ]   |
| 170 | A: | GLN | 89 | [ CA ]  | 3.90 | B: | VAL | 85  | [ O ]   |
| 171 | A: | GLN | 89 | [ O ]   | 3.49 | B: | VAL | 85  | [ O ]   |
| 172 | A: | ASP | 88 | [ CA ]  | 3.53 | B: | VAL | 85  | [ O ]   |
| 173 | A: | ASP | 88 | [ C ]   | 3.71 | B: | VAL | 85  | [ O ]   |
| 174 | A: | GLN | 89 | [ N ]   | 2.94 | B: | VAL | 85  | [ O ]   |
| 175 | A: | ASP | 88 | [ CG ]  | 3.73 | B: | VAL | 85  | [ O ]   |
| 176 | A: | ASP | 88 | [ OD2 ] | 3.32 | B: | VAL | 85  | [ O ]   |
| 177 | A: | ASP | 88 | [ OD2 ] | 3.42 | B: | ARG | 86  | [ N ]   |
| 178 | A: | VAL | 87 | [ O ]   | 3.68 | B: | ARG | 86  | [ CA ]  |
| 179 | A: | ASP | 88 | [ OD2 ] | 3.15 | B: | ARG | 86  | [ CA ]  |
| 180 | A: | ASP | 88 | [ OD2 ] | 3.23 | B: | ARG | 86  | [ CB ]  |
| 181 | A: | VAL | 87 | [ O ]   | 3.90 | B: | ARG | 86  | [ CG ]  |
| 182 | A: | VAL | 87 | [ O ]   | 3.65 | B: | ARG | 86  | [ CD ]  |
| 183 | A: | ASP | 88 | [ OD2 ] | 3.69 | B: | ARG | 86  | [ CD ]  |
| 184 | A: | VAL | 87 | [ O ]   | 3.69 | B: | ARG | 86  | [ C ]   |
| 185 | A: | VAL | 87 | [ O ]   | 2.84 | B: | PHE | 87  | [ N ]   |
| 186 | A: | VAL | 87 | [ C ]   | 3.87 | B: | PHE | 87  | [ N ]   |
| 187 | A: | VAL | 87 | [ O ]   | 3.69 | B: | PHE | 87  | [ CA ]  |
| 188 | A: | GLN | 86 | [ O ]   | 3.96 | B: | PHE | 87  | [ CB ]  |
| 189 | A: | VAL | 87 | [ O ]   | 3.75 | B: | PHE | 87  | [ CB ]  |
| 190 | A: | GLN | 86 | [ CD ]  | 3.82 | B: | PHE | 87  | [ CE2 ] |
| 191 | A: | GLN | 86 | [ O ]   | 3.58 | B: | PHE | 87  | [ CD2 ] |
| 192 | A: | VAL | 87 | [ O ]   | 3.71 | B: | PHE | 87  | [ CD2 ] |
| 193 | A: | VAL | 87 | [ C ]   | 3.72 | B: | PHE | 87  | [ CD2 ] |
| 194 | A: | ASP | 88 | [ N ]   | 3.84 | B: | PHE | 87  | [ CD2 ] |
| 195 | A: | VAL | 87 | [ O ]   | 3.52 | B: | PHE | 87  | [ O ]   |
| 196 | A: | ASP | 88 | [ OD2 ] | 3.47 | B: | ARG | 134 | [ CZ ]  |
| 197 | A: | ASP | 88 | [ OD1 ] | 3.28 | B: | ARG | 134 | [ NH1 ] |
| 198 | A: | ASP | 88 | [ CG ]  | 3.62 | B: | ARG | 134 | [ NH1 ] |
| 199 | A: | ASP | 88 | [ OD2 ] | 3.14 | B: | ARG | 134 | [ NH1 ] |

|     |    |     |    |   |     |   |      |    |     |     |   |     |   |
|-----|----|-----|----|---|-----|---|------|----|-----|-----|---|-----|---|
| 200 | A: | VAL | 90 | [ | CG2 | ] | 3.76 | B: | ARG | 134 | [ | NH1 | ] |
| 201 | A: | ASP | 88 | [ | CG  | ] | 3.98 | B: | ARG | 134 | [ | NH2 | ] |
| 202 | A: | ASP | 88 | [ | OD2 | ] | 2.98 | B: | ARG | 134 | [ | NH2 | ] |

**Supplementary Table 3** List of intermolecular interactions ( $\leq 4 \text{ \AA}$ ) between two *Mtb*HadAB dimers in the tetramer.

Interactions are calculated by NCONTACT program of CCP4, Hydrogen bonds are highlighted in green, while salt bridges are highlighted in blue.

| No. |    | <u>x,y,z</u> |    | <u>Dist. [Å]</u> |     | <u>-y,-x,-z-1/2</u> |      |    |     |    |   |     |   |
|-----|----|--------------|----|------------------|-----|---------------------|------|----|-----|----|---|-----|---|
| 1   | A: | ASP          | 16 | [                | CG  | ]                   | 3.44 | A: | ARG | 22 | [ | NH2 | ] |
| 2   | A: | ASP          | 16 | [                | OD1 | ]                   | 3.63 | A: | ARG | 22 | [ | NH1 | ] |
| 3   | A: | ASP          | 16 | [                | OD1 | ]                   | 3.82 | A: | ARG | 22 | [ | CZ  | ] |
| 4   | A: | ASP          | 16 | [                | OD1 | ]                   | 3.13 | A: | ARG | 22 | [ | NH2 | ] |
| 5   | A: | ASP          | 16 | [                | OD2 | ]                   | 3.86 | A: | ARG | 22 | [ | NH1 | ] |
| 6   | A: | ASP          | 16 | [                | OD2 | ]                   | 3.84 | A: | ARG | 22 | [ | CZ  | ] |
| 7   | A: | ASP          | 16 | [                | OD2 | ]                   | 3.30 | A: | ARG | 22 | [ | NH2 | ] |
| 8   | A: | ASP          | 16 | [                | OD2 | ]                   | 3.28 | A: | ARG | 26 | [ | CZ  | ] |
| 9   | A: | ASP          | 16 | [                | OD2 | ]                   | 2.88 | A: | ARG | 26 | [ | NH2 | ] |
| 10  | A: | ASP          | 16 | [                | OD2 | ]                   | 2.93 | A: | ARG | 26 | [ | NH1 | ] |
| 11  | A: | HIS          | 17 | [                | CG  | ]                   | 3.70 | A: | ARG | 22 | [ | NH2 | ] |
| 12  | A: | HIS          | 17 | [                | ND1 | ]                   | 3.67 | A: | ARG | 22 | [ | NH2 | ] |
| 13  | A: | HIS          | 17 | [                | CE1 | ]                   | 3.40 | A: | ARG | 22 | [ | NH1 | ] |
| 14  | A: | HIS          | 17 | [                | CE1 | ]                   | 3.54 | A: | ARG | 22 | [ | CZ  | ] |
| 15  | A: | HIS          | 17 | [                | CE1 | ]                   | 3.47 | A: | ARG | 22 | [ | NH2 | ] |
| 16  | A: | HIS          | 17 | [                | NE2 | ]                   | 3.68 | A: | ARG | 22 | [ | NH1 | ] |
| 17  | A: | HIS          | 17 | [                | NE2 | ]                   | 3.89 | A: | ARG | 22 | [ | NE  | ] |
| 18  | A: | HIS          | 17 | [                | NE2 | ]                   | 3.40 | A: | ARG | 22 | [ | CZ  | ] |
| 19  | A: | HIS          | 17 | [                | NE2 | ]                   | 3.34 | A: | ARG | 22 | [ | NH2 | ] |
| 20  | A: | HIS          | 17 | [                | CD2 | ]                   | 3.99 | A: | ARG | 22 | [ | CZ  | ] |
| 21  | A: | HIS          | 17 | [                | CD2 | ]                   | 3.48 | A: | ARG | 22 | [ | NH2 | ] |
| 22  | A: | HIS          | 17 | [                | C   | ]                   | 3.46 | A: | ARG | 22 | [ | NH2 | ] |
| 23  | A: | HIS          | 17 | [                | O   | ]                   | 3.87 | A: | ARG | 22 | [ | CZ  | ] |
| 24  | A: | HIS          | 17 | [                | O   | ]                   | 2.57 | A: | ARG | 22 | [ | NH2 | ] |
| 25  | A: | HIS          | 17 | [                | O   | ]                   | 3.73 | A: | GLU | 23 | [ | OE2 | ] |
| 26  | A: | TYR          | 18 | [                | CA  | ]                   | 3.51 | A: | GLU | 23 | [ | OE2 | ] |
| 27  | A: | TYR          | 18 | [                | CE2 | ]                   | 3.82 | A: | GLU | 23 | [ | CG  | ] |
| 28  | A: | TYR          | 18 | [                | CD2 | ]                   | 3.93 | A: | GLU | 23 | [ | CG  | ] |
| 29  | A: | TYR          | 18 | [                | CD2 | ]                   | 3.82 | A: | GLU | 23 | [ | CD  | ] |
| 30  | A: | TYR          | 18 | [                | C   | ]                   | 3.72 | A: | GLU | 23 | [ | OE2 | ] |
| 31  | A: | GLU          | 19 | [                | N   | ]                   | 3.76 | A: | GLU | 23 | [ | CG  | ] |

|    |    |     |    |   |     |   |      |    |     |    |   |     |   |
|----|----|-----|----|---|-----|---|------|----|-----|----|---|-----|---|
| 32 | A: | GLU | 19 | [ | N   | ] | 2.96 | A: | GLU | 23 | [ | OE2 | ] |
| 33 | A: | GLU | 19 | [ | N   | ] | 3.73 | A: | GLU | 23 | [ | CD  | ] |
| 34 | A: | GLU | 19 | [ | CA  | ] | 3.97 | A: | GLU | 23 | [ | OE2 | ] |
| 35 | A: | GLU | 19 | [ | CB  | ] | 3.91 | A: | GLU | 23 | [ | OE2 | ] |
| 36 | A: | GLU | 19 | [ | CG  | ] | 3.90 | A: | ARG | 22 | [ | NE  | ] |
| 37 | A: | GLU | 19 | [ | CD  | ] | 3.80 | A: | ARG | 22 | [ | CD  | ] |
| 38 | A: | GLU | 19 | [ | CD  | ] | 3.81 | A: | ARG | 22 | [ | NE  | ] |
| 39 | A: | GLU | 19 | [ | OE1 | ] | 3.89 | A: | ARG | 22 | [ | CG  | ] |
| 40 | A: | GLU | 19 | [ | OE2 | ] | 3.77 | A: | ARG | 22 | [ | CD  | ] |
| 41 | A: | GLU | 19 | [ | OE2 | ] | 3.78 | A: | ARG | 22 | [ | NE  | ] |
| 42 | A: | GLU | 19 | [ | O   | ] | 3.35 | A: | GLU | 23 | [ | CG  | ] |
| 43 | A: | GLU | 21 | [ | CA  | ] | 3.68 | A: | GLU | 21 | [ | OE1 | ] |
| 44 | A: | GLU | 21 | [ | CA  | ] | 3.75 | A: | GLU | 21 | [ | CD  | ] |
| 45 | A: | GLU | 21 | [ | CA  | ] | 3.95 | A: | GLU | 21 | [ | OE2 | ] |
| 46 | A: | GLU | 21 | [ | CB  | ] | 3.19 | A: | GLU | 21 | [ | CG  | ] |
| 47 | A: | GLU | 21 | [ | CB  | ] | 3.03 | A: | GLU | 21 | [ | OE1 | ] |
| 48 | A: | GLU | 21 | [ | CB  | ] | 3.64 | A: | GLU | 21 | [ | CB  | ] |
| 49 | A: | GLU | 21 | [ | CB  | ] | 2.62 | A: | GLU | 21 | [ | CD  | ] |
| 50 | A: | GLU | 21 | [ | CB  | ] | 2.66 | A: | GLU | 21 | [ | OE2 | ] |
| 51 | A: | GLU | 21 | [ | CG  | ] | 3.20 | A: | GLU | 21 | [ | CG  | ] |
| 52 | A: | GLU | 21 | [ | CG  | ] | 3.98 | A: | GLU | 21 | [ | OE1 | ] |
| 53 | A: | GLU | 21 | [ | CG  | ] | 3.19 | A: | GLU | 21 | [ | CB  | ] |
| 54 | A: | GLU | 21 | [ | CG  | ] | 3.32 | A: | GLU | 21 | [ | CD  | ] |
| 55 | A: | GLU | 21 | [ | CG  | ] | 3.45 | A: | GLU | 21 | [ | OE2 | ] |
| 56 | A: | GLU | 21 | [ | CD  | ] | 3.75 | A: | GLU | 21 | [ | CA  | ] |
| 57 | A: | GLU | 21 | [ | CD  | ] | 3.32 | A: | GLU | 21 | [ | CG  | ] |
| 58 | A: | GLU | 21 | [ | CD  | ] | 2.62 | A: | GLU | 21 | [ | CB  | ] |
| 59 | A: | GLU | 21 | [ | CD  | ] | 3.96 | A: | GLU | 21 | [ | C   | ] |
| 60 | A: | GLU | 21 | [ | CD  | ] | 4.00 | A: | ARG | 22 | [ | N   | ] |
| 61 | A: | GLU | 21 | [ | CD  | ] | 3.70 | A: | GLU | 23 | [ | N   | ] |
| 62 | A: | GLU | 21 | [ | CD  | ] | 3.82 | A: | GLU | 23 | [ | CB  | ] |
| 63 | A: | GLU | 21 | [ | CD  | ] | 3.64 | A: | GLU | 21 | [ | CD  | ] |
| 64 | A: | GLU | 21 | [ | CD  | ] | 3.45 | A: | GLU | 21 | [ | OE2 | ] |
| 65 | A: | GLU | 21 | [ | CD  | ] | 3.92 | A: | GLU | 23 | [ | CG  | ] |
| 66 | A: | GLU | 21 | [ | OE1 | ] | 3.68 | A: | GLU | 21 | [ | CA  | ] |
| 67 | A: | GLU | 21 | [ | OE1 | ] | 3.98 | A: | GLU | 21 | [ | CG  | ] |
| 68 | A: | GLU | 21 | [ | OE1 | ] | 3.03 | A: | GLU | 21 | [ | CB  | ] |
| 69 | A: | GLU | 21 | [ | OE1 | ] | 3.53 | A: | GLU | 21 | [ | C   | ] |
| 70 | A: | GLU | 21 | [ | OE1 | ] | 3.18 | A: | ARG | 22 | [ | N   | ] |
| 71 | A: | GLU | 21 | [ | OE1 | ] | 3.95 | A: | ARG | 22 | [ | CA  | ] |
| 72 | A: | GLU | 21 | [ | OE1 | ] | 3.86 | A: | ARG | 22 | [ | C   | ] |
| 73 | A: | GLU | 21 | [ | OE1 | ] | 2.91 | A: | GLU | 23 | [ | N   | ] |
| 74 | A: | GLU | 21 | [ | OE1 | ] | 3.74 | A: | GLU | 23 | [ | CA  | ] |
| 75 | A: | GLU | 21 | [ | OE1 | ] | 3.47 | A: | GLU | 23 | [ | CB  | ] |

|     |    |     |    |   |     |   |      |    |     |    |   |     |   |
|-----|----|-----|----|---|-----|---|------|----|-----|----|---|-----|---|
| 76  | A: | GLU | 21 | [ | OE1 | ] | 3.31 | A: | GLU | 23 | [ | CG  | ] |
| 77  | A: | GLU | 21 | [ | OE2 | ] | 3.95 | A: | GLU | 21 | [ | CA  | ] |
| 78  | A: | GLU | 21 | [ | OE2 | ] | 3.45 | A: | GLU | 21 | [ | CG  | ] |
| 79  | A: | GLU | 21 | [ | OE2 | ] | 2.66 | A: | GLU | 21 | [ | CB  | ] |
| 80  | A: | GLU | 21 | [ | OE2 | ] | 3.74 | A: | GLU | 23 | [ | N   | ] |
| 81  | A: | GLU | 21 | [ | OE2 | ] | 3.60 | A: | GLU | 23 | [ | CB  | ] |
| 82  | A: | GLU | 21 | [ | OE2 | ] | 3.49 | A: | LYS | 24 | [ | N   | ] |
| 83  | A: | GLU | 21 | [ | OE2 | ] | 3.45 | A: | GLU | 21 | [ | CD  | ] |
| 84  | A: | GLU | 21 | [ | OE2 | ] | 2.84 | A: | GLU | 21 | [ | OE2 | ] |
| 85  | A: | GLU | 21 | [ | C   | ] | 3.53 | A: | GLU | 21 | [ | OE1 | ] |
| 86  | A: | GLU | 21 | [ | C   | ] | 3.96 | A: | GLU | 21 | [ | CD  | ] |
| 87  | A: | ARG | 22 | [ | N   | ] | 3.18 | A: | GLU | 21 | [ | OE1 | ] |
| 88  | A: | ARG | 22 | [ | N   | ] | 4.00 | A: | GLU | 21 | [ | CD  | ] |
| 89  | A: | ARG | 22 | [ | CA  | ] | 3.95 | A: | GLU | 21 | [ | OE1 | ] |
| 90  | A: | ARG | 22 | [ | CG  | ] | 3.89 | A: | GLU | 19 | [ | OE1 | ] |
| 91  | A: | ARG | 22 | [ | CD  | ] | 3.77 | A: | GLU | 19 | [ | OE2 | ] |
| 92  | A: | ARG | 22 | [ | CD  | ] | 3.80 | A: | GLU | 19 | [ | CD  | ] |
| 93  | A: | ARG | 22 | [ | NE  | ] | 3.89 | A: | HIS | 17 | [ | NE2 | ] |
| 94  | A: | ARG | 22 | [ | NE  | ] | 3.78 | A: | GLU | 19 | [ | OE2 | ] |
| 95  | A: | ARG | 22 | [ | NE  | ] | 3.90 | A: | GLU | 19 | [ | CG  | ] |
| 96  | A: | ARG | 22 | [ | NE  | ] | 3.81 | A: | GLU | 19 | [ | CD  | ] |
| 97  | A: | ARG | 22 | [ | CZ  | ] | 3.87 | A: | HIS | 17 | [ | O   | ] |
| 98  | A: | ARG | 22 | [ | CZ  | ] | 3.82 | A: | ASP | 16 | [ | OD1 | ] |
| 99  | A: | ARG | 22 | [ | CZ  | ] | 3.84 | A: | ASP | 16 | [ | OD2 | ] |
| 100 | A: | ARG | 22 | [ | CZ  | ] | 3.40 | A: | HIS | 17 | [ | NE2 | ] |
| 101 | A: | ARG | 22 | [ | CZ  | ] | 3.99 | A: | HIS | 17 | [ | CD2 | ] |
| 102 | A: | ARG | 22 | [ | CZ  | ] | 3.54 | A: | HIS | 17 | [ | CE1 | ] |
| 103 | A: | ARG | 22 | [ | NH1 | ] | 3.63 | A: | ASP | 16 | [ | OD1 | ] |
| 104 | A: | ARG | 22 | [ | NH1 | ] | 3.86 | A: | ASP | 16 | [ | OD2 | ] |
| 105 | A: | ARG | 22 | [ | NH1 | ] | 3.68 | A: | HIS | 17 | [ | NE2 | ] |
| 106 | A: | ARG | 22 | [ | NH1 | ] | 3.40 | A: | HIS | 17 | [ | CE1 | ] |
| 107 | A: | ARG | 22 | [ | NH2 | ] | 3.46 | A: | HIS | 17 | [ | C   | ] |
| 108 | A: | ARG | 22 | [ | NH2 | ] | 2.57 | A: | HIS | 17 | [ | O   | ] |
| 109 | A: | ARG | 22 | [ | NH2 | ] | 3.44 | A: | ASP | 16 | [ | CG  | ] |
| 110 | A: | ARG | 22 | [ | NH2 | ] | 3.13 | A: | ASP | 16 | [ | OD1 | ] |
| 111 | A: | ARG | 22 | [ | NH2 | ] | 3.30 | A: | ASP | 16 | [ | OD2 | ] |
| 112 | A: | ARG | 22 | [ | NH2 | ] | 3.70 | A: | HIS | 17 | [ | CG  | ] |
| 113 | A: | ARG | 22 | [ | NH2 | ] | 3.34 | A: | HIS | 17 | [ | NE2 | ] |
| 114 | A: | ARG | 22 | [ | NH2 | ] | 3.48 | A: | HIS | 17 | [ | CD2 | ] |
| 115 | A: | ARG | 22 | [ | NH2 | ] | 3.67 | A: | HIS | 17 | [ | ND1 | ] |
| 116 | A: | ARG | 22 | [ | NH2 | ] | 3.47 | A: | HIS | 17 | [ | CE1 | ] |
| 117 | A: | ARG | 22 | [ | C   | ] | 3.86 | A: | GLU | 21 | [ | OE1 | ] |
| 118 | A: | GLU | 23 | [ | N   | ] | 2.91 | A: | GLU | 21 | [ | OE1 | ] |
| 119 | A: | GLU | 23 | [ | N   | ] | 3.70 | A: | GLU | 21 | [ | CD  | ] |

---

|     |    |     |    |   |     |   |      |    |     |    |   |     |   |
|-----|----|-----|----|---|-----|---|------|----|-----|----|---|-----|---|
| 120 | A: | GLU | 23 | [ | N   | ] | 3.74 | A: | GLU | 21 | [ | OE2 | ] |
| 121 | A: | GLU | 23 | [ | CA  | ] | 3.74 | A: | GLU | 21 | [ | OE1 | ] |
| 122 | A: | GLU | 23 | [ | CB  | ] | 3.47 | A: | GLU | 21 | [ | OE1 | ] |
| 123 | A: | GLU | 23 | [ | CB  | ] | 3.82 | A: | GLU | 21 | [ | CD  | ] |
| 124 | A: | GLU | 23 | [ | CB  | ] | 3.60 | A: | GLU | 21 | [ | OE2 | ] |
| 125 | A: | GLU | 23 | [ | CG  | ] | 3.82 | A: | TYR | 18 | [ | CE2 | ] |
| 126 | A: | GLU | 23 | [ | CG  | ] | 3.93 | A: | TYR | 18 | [ | CD2 | ] |
| 127 | A: | GLU | 23 | [ | CG  | ] | 3.76 | A: | GLU | 19 | [ | N   | ] |
| 128 | A: | GLU | 23 | [ | CG  | ] | 3.35 | A: | GLU | 19 | [ | O   | ] |
| 129 | A: | GLU | 23 | [ | CG  | ] | 3.31 | A: | GLU | 21 | [ | OE1 | ] |
| 130 | A: | GLU | 23 | [ | CG  | ] | 3.92 | A: | GLU | 21 | [ | CD  | ] |
| 131 | A: | GLU | 23 | [ | CD  | ] | 3.82 | A: | TYR | 18 | [ | CD2 | ] |
| 132 | A: | GLU | 23 | [ | CD  | ] | 3.73 | A: | GLU | 19 | [ | N   | ] |
| 133 | A: | GLU | 23 | [ | OE2 | ] | 3.73 | A: | HIS | 17 | [ | O   | ] |
| 134 | A: | GLU | 23 | [ | OE2 | ] | 3.51 | A: | TYR | 18 | [ | CA  | ] |
| 135 | A: | GLU | 23 | [ | OE2 | ] | 3.72 | A: | TYR | 18 | [ | C   | ] |
| 136 | A: | GLU | 23 | [ | OE2 | ] | 2.96 | A: | GLU | 19 | [ | N   | ] |
| 137 | A: | GLU | 23 | [ | OE2 | ] | 3.97 | A: | GLU | 19 | [ | CA  | ] |
| 138 | A: | GLU | 23 | [ | OE2 | ] | 3.91 | A: | GLU | 19 | [ | CB  | ] |
| 139 | A: | LYS | 24 | [ | N   | ] | 3.49 | A: | GLU | 21 | [ | OE2 | ] |
| 140 | A: | LYS | 24 | [ | CE  | ] | 3.49 | A: | GLU | 27 | [ | OE1 | ] |
| 141 | A: | LYS | 24 | [ | NZ  | ] | 3.39 | A: | GLU | 27 | [ | CD  | ] |
| 142 | A: | LYS | 24 | [ | NZ  | ] | 2.74 | A: | GLU | 27 | [ | OE1 | ] |
| 143 | A: | LYS | 24 | [ | NZ  | ] | 3.35 | A: | GLU | 27 | [ | OE2 | ] |
| 144 | A: | ARG | 26 | [ | CZ  | ] | 3.28 | A: | ASP | 16 | [ | OD2 | ] |
| 145 | A: | ARG | 26 | [ | NH1 | ] | 2.93 | A: | ASP | 16 | [ | OD2 | ] |
| 146 | A: | ARG | 26 | [ | NH2 | ] | 2.88 | A: | ASP | 16 | [ | OD2 | ] |
| 147 | A: | GLU | 27 | [ | CD  | ] | 3.39 | A: | LYS | 24 | [ | NZ  | ] |
| 148 | A: | GLU | 27 | [ | OE1 | ] | 3.49 | A: | LYS | 24 | [ | CE  | ] |
| 149 | A: | GLU | 27 | [ | OE1 | ] | 2.74 | A: | LYS | 24 | [ | NZ  | ] |
| 150 | A: | GLU | 27 | [ | OE2 | ] | 3.35 | A: | LYS | 24 | [ | NZ  | ] |
| 151 | A: | GLU | 27 | [ | OE2 | ] | 3.73 | A: | GLU | 27 | [ | OE2 | ] |
| 152 | B: | ARG | 24 | [ | CG  | ] | 3.70 | B: | TRP | 42 | [ | CZ3 | ] |
| 153 | B: | GLN | 25 | [ | CA  | ] | 3.94 | B: | TRP | 42 | [ | CH2 | ] |
| 154 | B: | GLN | 25 | [ | CA  | ] | 3.96 | B: | TRP | 42 | [ | CZ2 | ] |
| 155 | B: | GLN | 25 | [ | CB  | ] | 3.99 | B: | TRP | 42 | [ | CZ2 | ] |
| 156 | B: | GLN | 25 | [ | CD  | ] | 3.87 | B: | LEU | 37 | [ | CB  | ] |
| 157 | B: | GLN | 25 | [ | OE1 | ] | 3.80 | B: | LEU | 37 | [ | CB  | ] |
| 158 | B: | GLN | 25 | [ | OE1 | ] | 3.37 | B: | LEU | 37 | [ | O   | ] |
| 159 | B: | VAL | 28 | [ | CG1 | ] | 3.96 | B: | TRP | 42 | [ | CD1 | ] |
| 160 | B: | VAL | 28 | [ | CG1 | ] | 3.99 | B: | TRP | 42 | [ | NE1 | ] |
| 161 | B: | VAL | 28 | [ | CG2 | ] | 3.86 | B: | TRP | 42 | [ | CD2 | ] |
| 162 | B: | VAL | 28 | [ | CG2 | ] | 3.75 | B: | TRP | 42 | [ | CE3 | ] |
| 163 | B: | ASN | 29 | [ | CB  | ] | 3.80 | B: | LEU | 37 | [ | CD2 | ] |

---

|     |    |     |    |   |     |   |      |    |     |    |   |     |   |
|-----|----|-----|----|---|-----|---|------|----|-----|----|---|-----|---|
| 164 | B: | ASN | 29 | [ | ND2 | ] | 3.79 | B: | LEU | 37 | [ | CD1 | ] |
| 165 | B: | ASN | 29 | [ | ND2 | ] | 3.72 | B: | GLY | 32 | [ | CA  | ] |
| 166 | B: | ASN | 29 | [ | ND2 | ] | 3.44 | B: | LEU | 37 | [ | CD2 | ] |
| 167 | B: | ASN | 29 | [ | O   | ] | 3.73 | B: | GLY | 32 | [ | CA  | ] |
| 168 | B: | GLY | 32 | [ | CA  | ] | 3.73 | B: | ASN | 29 | [ | O   | ] |
| 169 | B: | GLY | 32 | [ | CA  | ] | 3.72 | B: | ASN | 29 | [ | ND2 | ] |
| 170 | B: | GLY | 32 | [ | O   | ] | 3.59 | B: | VAL | 33 | [ | CG2 | ] |
| 171 | B: | VAL | 33 | [ | CG2 | ] | 3.59 | B: | GLY | 32 | [ | O   | ] |
| 172 | B: | LEU | 37 | [ | CB  | ] | 3.87 | B: | GLN | 25 | [ | CD  | ] |
| 173 | B: | LEU | 37 | [ | CB  | ] | 3.80 | B: | GLN | 25 | [ | OE1 | ] |
| 174 | B: | LEU | 37 | [ | CD1 | ] | 3.79 | B: | ASN | 29 | [ | ND2 | ] |
| 175 | B: | LEU | 37 | [ | CD2 | ] | 3.80 | B: | ASN | 29 | [ | CB  | ] |
| 176 | B: | LEU | 37 | [ | CD2 | ] | 3.44 | B: | ASN | 29 | [ | ND2 | ] |
| 177 | B: | LEU | 37 | [ | O   | ] | 3.37 | B: | GLN | 25 | [ | OE1 | ] |
| 178 | B: | TRP | 42 | [ | CD1 | ] | 3.96 | B: | VAL | 28 | [ | CG1 | ] |
| 179 | B: | TRP | 42 | [ | NE1 | ] | 3.99 | B: | VAL | 28 | [ | CG1 | ] |
| 180 | B: | TRP | 42 | [ | CD2 | ] | 3.86 | B: | VAL | 28 | [ | CG2 | ] |
| 181 | B: | TRP | 42 | [ | CE3 | ] | 3.75 | B: | VAL | 28 | [ | CG2 | ] |
| 182 | B: | TRP | 42 | [ | CZ3 | ] | 3.70 | B: | ARG | 24 | [ | CG  | ] |
| 183 | B: | TRP | 42 | [ | CH2 | ] | 3.94 | B: | GLN | 25 | [ | CA  | ] |
| 184 | B: | TRP | 42 | [ | CZ2 | ] | 3.96 | B: | GLN | 25 | [ | CA  | ] |
| 185 | B: | TRP | 42 | [ | CZ2 | ] | 3.99 | B: | GLN | 25 | [ | CB  | ] |
| 186 | B: | ASP | 43 | [ | CG  | ] | 3.60 | B: | ASN | 95 | [ | ND2 | ] |
| 187 | B: | ASP | 43 | [ | OD2 | ] | 3.68 | B: | ASN | 95 | [ | CG  | ] |
| 188 | B: | ASP | 43 | [ | OD2 | ] | 3.75 | B: | ASN | 95 | [ | OD1 | ] |
| 189 | B: | ASP | 43 | [ | OD2 | ] | 2.80 | B: | ASN | 95 | [ | ND2 | ] |
| 190 | B: | ASN | 95 | [ | CG  | ] | 3.68 | B: | ASP | 43 | [ | OD2 | ] |
| 191 | B: | ASN | 95 | [ | OD1 | ] | 3.75 | B: | ASP | 43 | [ | OD2 | ] |
| 192 | B: | ASN | 95 | [ | ND2 | ] | 3.60 | B: | ASP | 43 | [ | CG  | ] |
| 193 | B: | ASN | 95 | [ | ND2 | ] | 2.80 | B: | ASP | 43 | [ | OD2 | ] |
